# Supplementary material for: The 2015 and 2016 wintertime air pollution in China: SO 2 emission changes derived from a WRF-Chem/EnKF coupled data assimilation system
Source: Copernicus journal article supplement (doi:10.5194/acp-19-8619-2019), 2019-07-08
Supplement: Supplementary file 1 [file acp-19-8619-2019-supplement.pdf]

Supplement of Atmos. Chem. Phys., 19, 8619–8650, 2019  
<https://doi.org/10.5194/acp-19-8619-2019-supplement>  
© Author(s) 2019. This work is distributed under  
the Creative Commons Attribution 4.0 License.

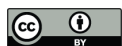

*Supplement of*

## **The 2015 and 2016 wintertime air pollution in China: SO<sub>2</sub> emission changes derived from a WRF-Chem/EnKF coupled data assimilation system**

**Dan Chen et al.**

*Correspondence to:* Zhiqian Liu (liuz@ucar.edu) and Dan Chen (dchen@ium.cn)

The copyright of individual parts of the supplement might differ from the CC BY 4.0 License.

**Figure S1.** Domain-averaged standard deviations of background errors ( $\mu\text{g m}^{-3}$ ) as a function of height for  $\text{SO}_2$ .

**Figure S2.** The time series of statistics between model simulations and observations for  $\text{SO}_2$ . O-observation, B-NO\_DA, A-CONC\_DA. Statistics includes number of data pairs, MEAN-mean bias, STDV- standard deviation, RMSE-root mean square error. Left:2015, right-2016.

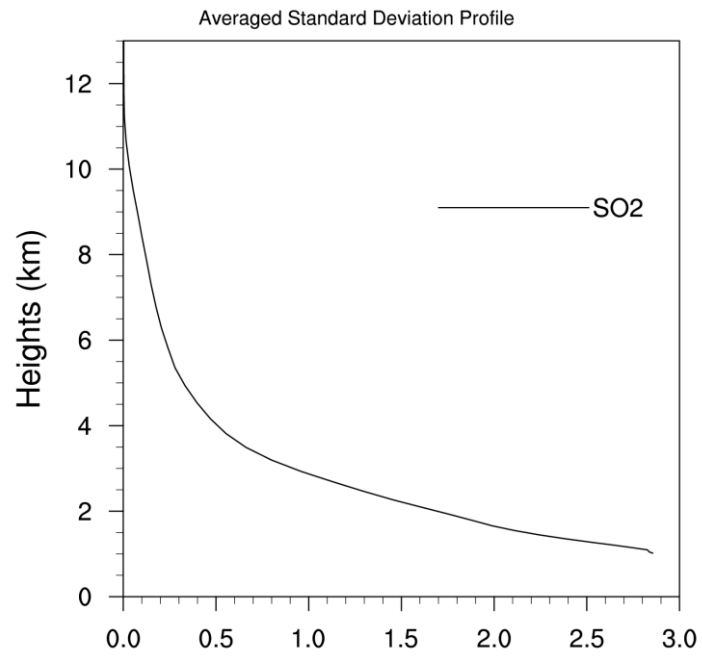

**Figure S1.** Domain-averaged standard deviations of background errors ( $\mu\text{g m}^{-3}$ ) as a function of height for SO2.

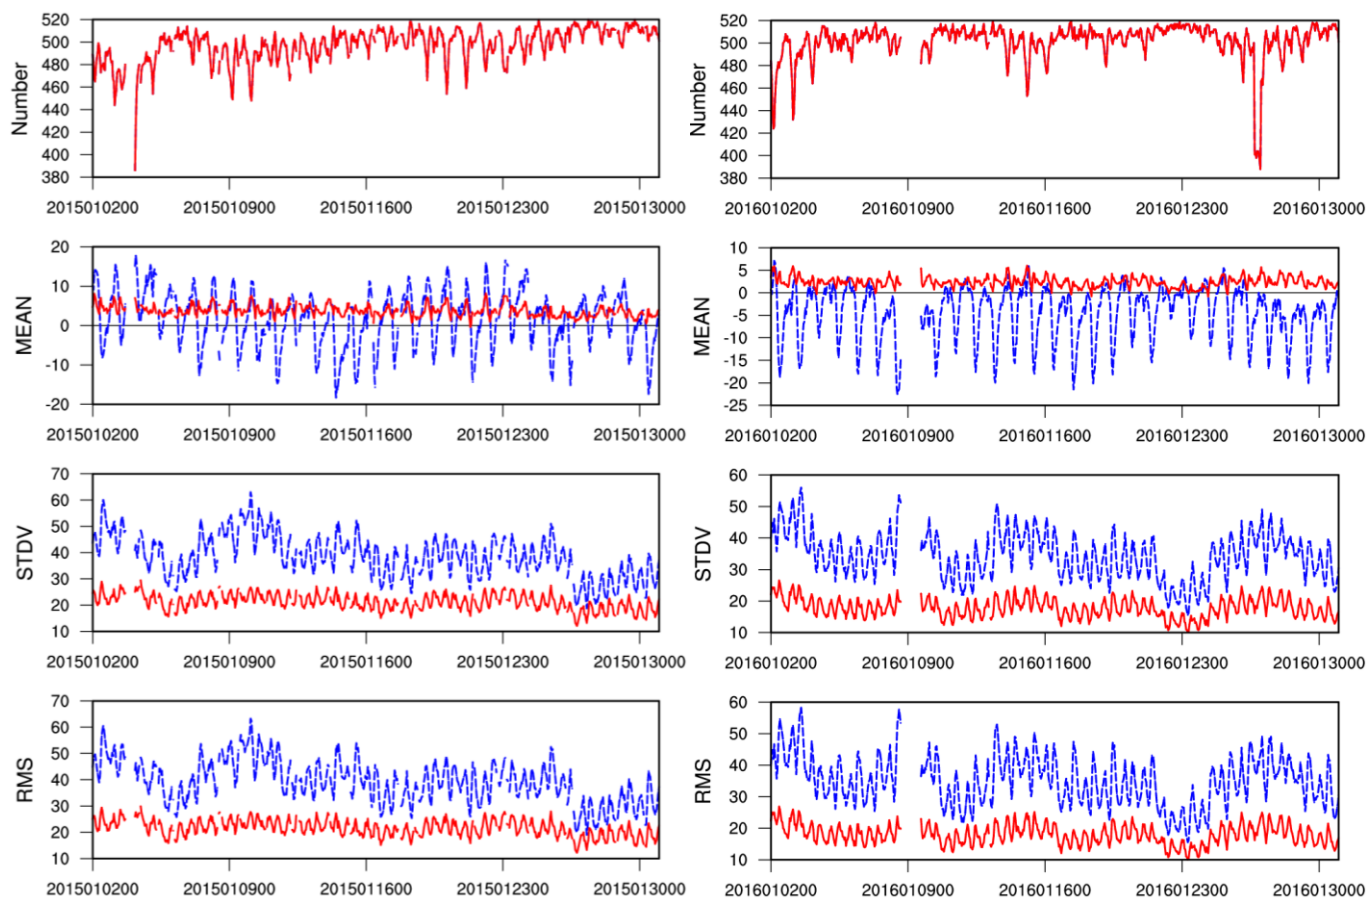

**Figure S2.** The time series of statistics between model simulations and observations for SO<sub>2</sub>. O-observation, B-NO\_DA, A-CONC\_DA. Statistics includes number of data pairs, MEAN-mean bias, STDDV- standard deviation, RMSE-root mean square error. Left:2015, right-2016.
